# Supplementary material for: The C4 Protein from Tomato Yellow Leaf Curl Virus Can Broadly Interact with Plant Receptor-Like Kinases
Source: PubMed Central journal article supplement (PMC6893482; doi:10.3390/v11111009), 2019-10-31
Supplement: viruses-11-01009-s001.pdf [file viruses-11-01009-s001.pdf]

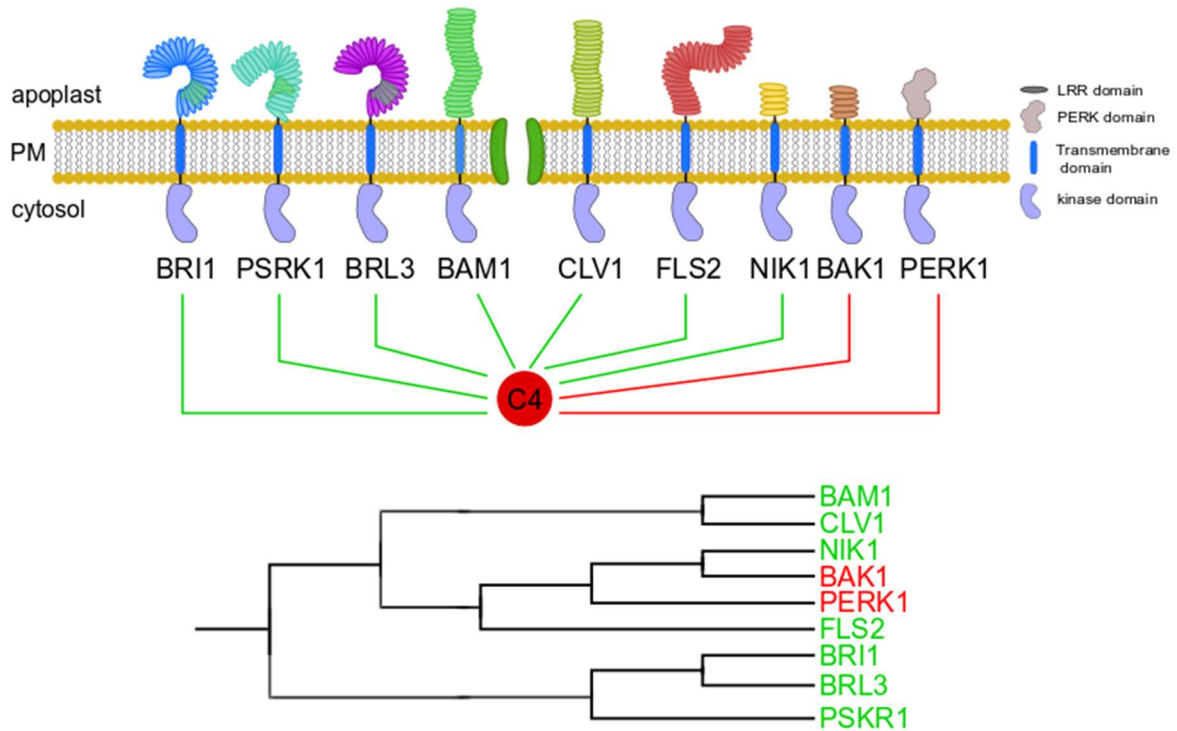

**Supplementary Figure 2. Interaction landscape of C4 from TYLCV with selected members of the RLK family. Green lines indicate interactions detected; red lines indicate interactions not detected.**

**Supplementary Table 1. DNA oligonucleotides used in this study. Sequences added for TOPO/Gateway® cloning are underlined.**

| Primers used for cloning             |                                                                |                      |
|--------------------------------------|----------------------------------------------------------------|----------------------|
| Primer name                          | Primer sequence                                                | Reference            |
| <i>AtCLV1_fw</i>                     | <u>CACCATGGCGATGAGACTTTTGAAG</u>                               | This study           |
| <i>AtCLV1_rv</i>                     | CAGAACGCGATCAAGTTCGC                                           | This study           |
| <i>AtBRI1_fw</i>                     | <u>GGGGACAAGTTTGTACAAAAAAGCAGGCTATGAAG</u><br>ACTTTTCAAGCTTC   | This study           |
| <i>AtBRI1_rv</i>                     | <u>GGGGACCACTTTGTACAAGAAAGCTGGGTTAATTT</u><br>TCCTTCAGGAAGCTTC | This study           |
| <i>AtBRL3_fw</i>                     | <u>CACCATGAAACAACAATGGCAGTT</u>                                | This study           |
| <i>AtBRL3_rv</i>                     | AGGCTCCTTATCTCGTGATT                                           | This study           |
| <i>AtPSKR1_fw</i>                    | <u>GGGGACAAGTTTGTACAAAAAAGCAGGCTATGCGT</u><br>GTTTCATCGTTTTTG  | This study           |
| <i>AtPSKR1_rv</i>                    | <u>GGGGACCACTTTGTACAAGAAAGCTGGGTGACAT</u><br>CATCAAGCCAAGAG    | This study           |
| <i>AtFLS2_fw</i>                     | <u>CACCATGAAGTTACTCTCAAAGACCTT</u>                             | This study           |
| <i>AtFLS2_rv</i>                     | AACTTCTCGATCCTCGTTACGATCT                                      | This study           |
| <i>AtBAK1_fw</i>                     | <u>CACCATGGAACGAAGATTAATGAT</u>                                | This study           |
| <i>AtBAK1_rv</i>                     | TCTTGACCCGAGGGGTATTC                                           | This study           |
| <i>AtPERK1_fw</i>                    | <u>GGGGACAAGTTTGTACAAAAAAGCAGGCTATGTCC</u><br>ACAGCGCCGTC      | This study           |
| <i>AtPERK1_rv</i>                    | <u>GGGGACCACTTTGTACAAGAAAGCTGGGTAAAGAG</u><br>AGGTCCACTATAACCT | This study           |
| Primers used for quantitative RT-PCT |                                                                |                      |
| Primer name                          | Primer sequence (Pair efficiency)                              | Reference            |
| <i>EXP8_fw</i>                       | AACACGGCGGCTTTAAGTAC (101%)                                    | This study           |
| <i>EXP8_rv</i>                       | TGCTGAAGAGGAGGATTGCA                                           | This study           |
| <i>FRK1_fw</i>                       | ATCTTCGCTTGGAGCTTCTC (98%)                                     | Boutrot et al., 2010 |
| <i>FRK1_rv</i>                       | TGCAGCGCAAGGACTAGAG                                            | Boutrot et al., 2010 |

|                   |                               |                 |
|-------------------|-------------------------------|-----------------|
| <i>CYP812F_fw</i> | CAGCTGCACCACTTCTTGTTTC (100%) | Xu et al., 2016 |
| <i>CYP812F_rv</i> | AGGCATAAACTTCTCGGGCTC         | Xu et al., 2016 |
| <i>ACTIN2_fw</i>  | CAGTGTCTGGATCGGTGGTT (102%)   | This study      |
| <i>ACTIN2_rv</i>  | TGAACGATTCCTGGACCTGC          | This study      |

---
